# Supplementary material
Source: ML conference proceedings conference paper supplement (https://openaccess.thecvf.com/content/CVPR2026/html/Yin_LightRR_A_Lightweight_CVPR_2026_paper.html)
Supplement: Supplementary file 1 [file Yin_LightRR_A_Lightweight_CVPR_2026_supplemental.pdf]

# LightRR: A Lightweight Network for Single Image Reflection Removal

## Supplementary Material

|     |                                                                                                                                                                                                                                                                                                                                                                                                                                       |                                                                                                                                                                                                                                                                                                                                                                                     |     |
|-----|---------------------------------------------------------------------------------------------------------------------------------------------------------------------------------------------------------------------------------------------------------------------------------------------------------------------------------------------------------------------------------------------------------------------------------------|-------------------------------------------------------------------------------------------------------------------------------------------------------------------------------------------------------------------------------------------------------------------------------------------------------------------------------------------------------------------------------------|-----|
| 473 | <b>6. Additional Qualitative Results</b>                                                                                                                                                                                                                                                                                                                                                                                              |                                                                                                                                                                                                                                                                                                                                                                                     |     |
| 474 | Due to space constraints in the main manuscript, only a subset of visual comparisons was provided. In this section, we present extensive qualitative comparisons against state-of-the-art (SOTA) methods on four real-world benchmarks: Real20 [33], SIR <sup>2</sup> Objects, PostCard, and Wild [26].                                                                                                                               |                                                                                                                                                                                                                                                                                                                                                                                     |     |
| 475 |                                                                                                                                                                                                                                                                                                                                                                                                                                       |                                                                                                                                                                                                                                                                                                                                                                                     |     |
| 476 |                                                                                                                                                                                                                                                                                                                                                                                                                                       |                                                                                                                                                                                                                                                                                                                                                                                     |     |
| 477 |                                                                                                                                                                                                                                                                                                                                                                                                                                       |                                                                                                                                                                                                                                                                                                                                                                                     |     |
| 478 |                                                                                                                                                                                                                                                                                                                                                                                                                                       |                                                                                                                                                                                                                                                                                                                                                                                     |     |
| 479 | <b>6.1. Comparison on Benchmarks</b>                                                                                                                                                                                                                                                                                                                                                                                                  |                                                                                                                                                                                                                                                                                                                                                                                     |     |
| 480 | Figure 8 illustrates the visual performance of LightRR compared to competing methods. As observed, our method effectively removes reflection artifacts while preserving high-frequency transmission details, even in challenging scenarios characterized by strong reflections or complex backgrounds.                                                                                                                                |                                                                                                                                                                                                                                                                                                                                                                                     |     |
| 481 |                                                                                                                                                                                                                                                                                                                                                                                                                                       |                                                                                                                                                                                                                                                                                                                                                                                     |     |
| 482 |                                                                                                                                                                                                                                                                                                                                                                                                                                       |                                                                                                                                                                                                                                                                                                                                                                                     |     |
| 483 |                                                                                                                                                                                                                                                                                                                                                                                                                                       |                                                                                                                                                                                                                                                                                                                                                                                     |     |
| 484 |                                                                                                                                                                                                                                                                                                                                                                                                                                       |                                                                                                                                                                                                                                                                                                                                                                                     |     |
| 485 |                                                                                                                                                                                                                                                                                                                                                                                                                                       |                                                                                                                                                                                                                                                                                                                                                                                     |     |
| 486 | <b>Limitations and Failure Cases.</b> While LightRR achieves an excellent balance between efficiency and performance, it may encounter difficulties under extreme conditions. As illustrated in Figure 8, when the reflection intensity is excessively high (see the first column) or when the reflection texture is indistinguishable from the background texture (see the fourth column), our model may exhibit residual artifacts. |                                                                                                                                                                                                                                                                                                                                                                                     |     |
| 487 |                                                                                                                                                                                                                                                                                                                                                                                                                                       |                                                                                                                                                                                                                                                                                                                                                                                     |     |
| 488 |                                                                                                                                                                                                                                                                                                                                                                                                                                       |                                                                                                                                                                                                                                                                                                                                                                                     |     |
| 489 |                                                                                                                                                                                                                                                                                                                                                                                                                                       |                                                                                                                                                                                                                                                                                                                                                                                     |     |
| 490 |                                                                                                                                                                                                                                                                                                                                                                                                                                       |                                                                                                                                                                                                                                                                                                                                                                                     |     |
| 491 |                                                                                                                                                                                                                                                                                                                                                                                                                                       |                                                                                                                                                                                                                                                                                                                                                                                     |     |
| 492 |                                                                                                                                                                                                                                                                                                                                                                                                                                       |                                                                                                                                                                                                                                                                                                                                                                                     |     |
| 493 |                                                                                                                                                                                                                                                                                                                                                                                                                                       |                                                                                                                                                                                                                                                                                                                                                                                     |     |
| 494 | <b>6.2. Visual Analysis of Ablation Studies</b>                                                                                                                                                                                                                                                                                                                                                                                       |                                                                                                                                                                                                                                                                                                                                                                                     |     |
| 495 | To visually demonstrate the contribution of each proposed component, we provide comparisons of the ablation variants discussed in the main paper (Tables 4, 5, and 6). Figure 9 presents the results of: (1) removing the AF-SSM, (2) replacing WDD/WSU with sub-pixel convolution, and (3) training without Knowledge Distillation.                                                                                                  |                                                                                                                                                                                                                                                                                                                                                                                     |     |
| 496 |                                                                                                                                                                                                                                                                                                                                                                                                                                       |                                                                                                                                                                                                                                                                                                                                                                                     |     |
| 497 |                                                                                                                                                                                                                                                                                                                                                                                                                                       |                                                                                                                                                                                                                                                                                                                                                                                     |     |
| 498 |                                                                                                                                                                                                                                                                                                                                                                                                                                       |                                                                                                                                                                                                                                                                                                                                                                                     |     |
| 499 |                                                                                                                                                                                                                                                                                                                                                                                                                                       |                                                                                                                                                                                                                                                                                                                                                                                     |     |
| 500 |                                                                                                                                                                                                                                                                                                                                                                                                                                       |                                                                                                                                                                                                                                                                                                                                                                                     |     |
| 501 | • (c) <b>Ours (LightRR):</b> The proposed method achieves the best visual quality, effectively removing the white grid reflections while preserving the sharp edges of the blue dome and windows.                                                                                                                                                                                                                                     |                                                                                                                                                                                                                                                                                                                                                                                     |     |
| 502 |                                                                                                                                                                                                                                                                                                                                                                                                                                       |                                                                                                                                                                                                                                                                                                                                                                                     |     |
| 503 |                                                                                                                                                                                                                                                                                                                                                                                                                                       |                                                                                                                                                                                                                                                                                                                                                                                     |     |
| 504 |                                                                                                                                                                                                                                                                                                                                                                                                                                       |                                                                                                                                                                                                                                                                                                                                                                                     |     |
| 505 | • (d) <b>Impact of AF-SSM:</b> Replacing our AF-SSM with a standard 2D-SSM results in incomplete reflection removal. As seen in (d), the standard SSM fails to capture the frequency-specific characteristics of the reflection, leaving visible residual streaks in the sky.                                                                                                                                                         |                                                                                                                                                                                                                                                                                                                                                                                     |     |
| 506 |                                                                                                                                                                                                                                                                                                                                                                                                                                       |                                                                                                                                                                                                                                                                                                                                                                                     |     |
| 507 |                                                                                                                                                                                                                                                                                                                                                                                                                                       |                                                                                                                                                                                                                                                                                                                                                                                     |     |
| 508 |                                                                                                                                                                                                                                                                                                                                                                                                                                       |                                                                                                                                                                                                                                                                                                                                                                                     |     |
| 509 |                                                                                                                                                                                                                                                                                                                                                                                                                                       |                                                                                                                                                                                                                                                                                                                                                                                     |     |
| 510 | • (e) <b>Impact of Wavelet Sampling:</b> Using standard Sub-pixel Convolution instead of our Wavelet-based sampling (WDD/WSU) leads to a loss of high-frequency details. The resulting image (e) appears slightly blurred compared to Ours, validating the effectiveness of reversible wavelet transforms for detail preservation.                                                                                                    |                                                                                                                                                                                                                                                                                                                                                                                     |     |
| 511 |                                                                                                                                                                                                                                                                                                                                                                                                                                       |                                                                                                                                                                                                                                                                                                                                                                                     |     |
| 512 |                                                                                                                                                                                                                                                                                                                                                                                                                                       |                                                                                                                                                                                                                                                                                                                                                                                     |     |
| 513 |                                                                                                                                                                                                                                                                                                                                                                                                                                       |                                                                                                                                                                                                                                                                                                                                                                                     |     |
| 514 |                                                                                                                                                                                                                                                                                                                                                                                                                                       |                                                                                                                                                                                                                                                                                                                                                                                     |     |
| 515 |                                                                                                                                                                                                                                                                                                                                                                                                                                       |                                                                                                                                                                                                                                                                                                                                                                                     |     |
| 516 | • (f) <b>Direct VGG Injection (vs. KD):</b> Simply injecting VGG19 features into the encoder without distillation (Variant B in the main paper) yields suboptimal results.                                                                                                                                                                                                                                                            |                                                                                                                                                                                                                                                                                                                                                                                     |     |
| 517 |                                                                                                                                                                                                                                                                                                                                                                                                                                       |                                                                                                                                                                                                                                                                                                                                                                                     |     |
| 518 |                                                                                                                                                                                                                                                                                                                                                                                                                                       |                                                                                                                                                                                                                                                                                                                                                                                     |     |
|     |                                                                                                                                                                                                                                                                                                                                                                                                                                       | As discussed in our paper, these generic classification features are not aligned with the reflection removal task. Directly using them restricts the lightweight model’s flexibility, leading to color shifts or residual artifacts.                                                                                                                                                | 519 |
|     |                                                                                                                                                                                                                                                                                                                                                                                                                                       |                                                                                                                                                                                                                                                                                                                                                                                     | 520 |
|     |                                                                                                                                                                                                                                                                                                                                                                                                                                       |                                                                                                                                                                                                                                                                                                                                                                                     | 521 |
|     |                                                                                                                                                                                                                                                                                                                                                                                                                                       |                                                                                                                                                                                                                                                                                                                                                                                     | 522 |
|     |                                                                                                                                                                                                                                                                                                                                                                                                                                       | • (g) <b>w/o Pre-trained Features:</b> Training the lightweight network from scratch (Variant A) results in the poorest performance. Without the semantic guidance from the Teacher network (Knowledge Distillation) or pre-trained features, the shallow encoder struggles to distinguish the reflection layer.                                                                    | 523 |
|     |                                                                                                                                                                                                                                                                                                                                                                                                                                       |                                                                                                                                                                                                                                                                                                                                                                                     | 524 |
|     |                                                                                                                                                                                                                                                                                                                                                                                                                                       |                                                                                                                                                                                                                                                                                                                                                                                     | 525 |
|     |                                                                                                                                                                                                                                                                                                                                                                                                                                       |                                                                                                                                                                                                                                                                                                                                                                                     | 526 |
|     |                                                                                                                                                                                                                                                                                                                                                                                                                                       |                                                                                                                                                                                                                                                                                                                                                                                     | 527 |
|     |                                                                                                                                                                                                                                                                                                                                                                                                                                       |                                                                                                                                                                                                                                                                                                                                                                                     | 528 |
|     |                                                                                                                                                                                                                                                                                                                                                                                                                                       | <b>6.3. Lightweight Network Configuration for SOTA Methods</b>                                                                                                                                                                                                                                                                                                                      | 529 |
|     |                                                                                                                                                                                                                                                                                                                                                                                                                                       |                                                                                                                                                                                                                                                                                                                                                                                     | 530 |
|     |                                                                                                                                                                                                                                                                                                                                                                                                                                       | In the main manuscript, we adjusted the architectural hyperparameters of several SOTA methods to align their parameter counts with those of our proposed LightRR, ensuring a fair comparison under lightweight constraints. We summarize the specific architectural modifications for these lightweight variants in Table 7.                                                        | 531 |
|     |                                                                                                                                                                                                                                                                                                                                                                                                                                       |                                                                                                                                                                                                                                                                                                                                                                                     | 532 |
|     |                                                                                                                                                                                                                                                                                                                                                                                                                                       |                                                                                                                                                                                                                                                                                                                                                                                     | 533 |
|     |                                                                                                                                                                                                                                                                                                                                                                                                                                       |                                                                                                                                                                                                                                                                                                                                                                                     | 534 |
|     |                                                                                                                                                                                                                                                                                                                                                                                                                                       |                                                                                                                                                                                                                                                                                                                                                                                     | 535 |
|     |                                                                                                                                                                                                                                                                                                                                                                                                                                       |                                                                                                                                                                                                                                                                                                                                                                                     | 536 |
|     |                                                                                                                                                                                                                                                                                                                                                                                                                                       | Visual comparisons of these lightweight variants are presented in Figure 10. It can be observed that, despite having a comparable number of parameters, our model effectively eliminates artifacts caused by highlights and strong semantic reflections. In contrast, the performance of other competing models degrades significantly when reduced to a lightweight configuration. | 537 |
|     |                                                                                                                                                                                                                                                                                                                                                                                                                                       |                                                                                                                                                                                                                                                                                                                                                                                     | 538 |
|     |                                                                                                                                                                                                                                                                                                                                                                                                                                       |                                                                                                                                                                                                                                                                                                                                                                                     | 539 |
|     |                                                                                                                                                                                                                                                                                                                                                                                                                                       |                                                                                                                                                                                                                                                                                                                                                                                     | 540 |
|     |                                                                                                                                                                                                                                                                                                                                                                                                                                       |                                                                                                                                                                                                                                                                                                                                                                                     | 541 |
|     |                                                                                                                                                                                                                                                                                                                                                                                                                                       |                                                                                                                                                                                                                                                                                                                                                                                     | 542 |
|     |                                                                                                                                                                                                                                                                                                                                                                                                                                       |                                                                                                                                                                                                                                                                                                                                                                                     | 543 |
|     |                                                                                                                                                                                                                                                                                                                                                                                                                                       | <b>7. Detailed Network Architecture</b>                                                                                                                                                                                                                                                                                                                                             | 544 |
|     |                                                                                                                                                                                                                                                                                                                                                                                                                                       |                                                                                                                                                                                                                                                                                                                                                                                     | 545 |
|     |                                                                                                                                                                                                                                                                                                                                                                                                                                       | In this section, we provide the detailed specification of the proposed LightRR architecture. The network adopts a four-stage U-shaped structure.                                                                                                                                                                                                                                    | 546 |
|     |                                                                                                                                                                                                                                                                                                                                                                                                                                       |                                                                                                                                                                                                                                                                                                                                                                                     | 547 |
|     |                                                                                                                                                                                                                                                                                                                                                                                                                                       | <b>7.1. Layer Configuration</b>                                                                                                                                                                                                                                                                                                                                                     | 548 |
|     |                                                                                                                                                                                                                                                                                                                                                                                                                                       |                                                                                                                                                                                                                                                                                                                                                                                     | 549 |
|     |                                                                                                                                                                                                                                                                                                                                                                                                                                       | We set the base channel width to $C = 32$ . Consequently, the channel dimensions expand as $[C, 2C, 4C, 8C]$ across the four stages. The specific number of AFM Blocks ( $N$ ) and the configuration of the Low-Frequency Semantic Fusion (LSF) heads are detailed in Table 8.                                                                                                      | 550 |
|     |                                                                                                                                                                                                                                                                                                                                                                                                                                       |                                                                                                                                                                                                                                                                                                                                                                                     | 551 |
|     |                                                                                                                                                                                                                                                                                                                                                                                                                                       |                                                                                                                                                                                                                                                                                                                                                                                     | 552 |
|     |                                                                                                                                                                                                                                                                                                                                                                                                                                       |                                                                                                                                                                                                                                                                                                                                                                                     | 553 |
|     |                                                                                                                                                                                                                                                                                                                                                                                                                                       | <b>7.2. Detailed Hyperparameters</b>                                                                                                                                                                                                                                                                                                                                                | 554 |
|     |                                                                                                                                                                                                                                                                                                                                                                                                                                       |                                                                                                                                                                                                                                                                                                                                                                                     | 555 |
|     |                                                                                                                                                                                                                                                                                                                                                                                                                                       | The specific hyperparameters for the core modules are configured as follows:                                                                                                                                                                                                                                                                                                        | 556 |
|     |                                                                                                                                                                                                                                                                                                                                                                                                                                       | • <b>AF-SSM (Mamba):</b> The state dimension ( $d_{\text{state}}$ ) is set to 16, and the expansion ratio ( $mlp\_ratio$ ) is set to 2.0. Bias terms in the linear layers are disabled.                                                                                                                                                                                             | 557 |
|     |                                                                                                                                                                                                                                                                                                                                                                                                                                       |                                                                                                                                                                                                                                                                                                                                                                                     | 558 |
|     |                                                                                                                                                                                                                                                                                                                                                                                                                                       |                                                                                                                                                                                                                                                                                                                                                                                     | 559 |
|     |                                                                                                                                                                                                                                                                                                                                                                                                                                       | • <b>Intermediate Processing Layers (Middlers):</b> The Low-Frequency (LL) features extracted from the encoder are processed by a lightweight “BasicLayer” (a stack of AFM                                                                                                                                                                                                          | 560 |
|     |                                                                                                                                                                                                                                                                                                                                                                                                                                       |                                                                                                                                                                                                                                                                                                                                                                                     | 561 |
|     |                                                                                                                                                                                                                                                                                                                                                                                                                                       |                                                                                                                                                                                                                                                                                                                                                                                     | 562 |

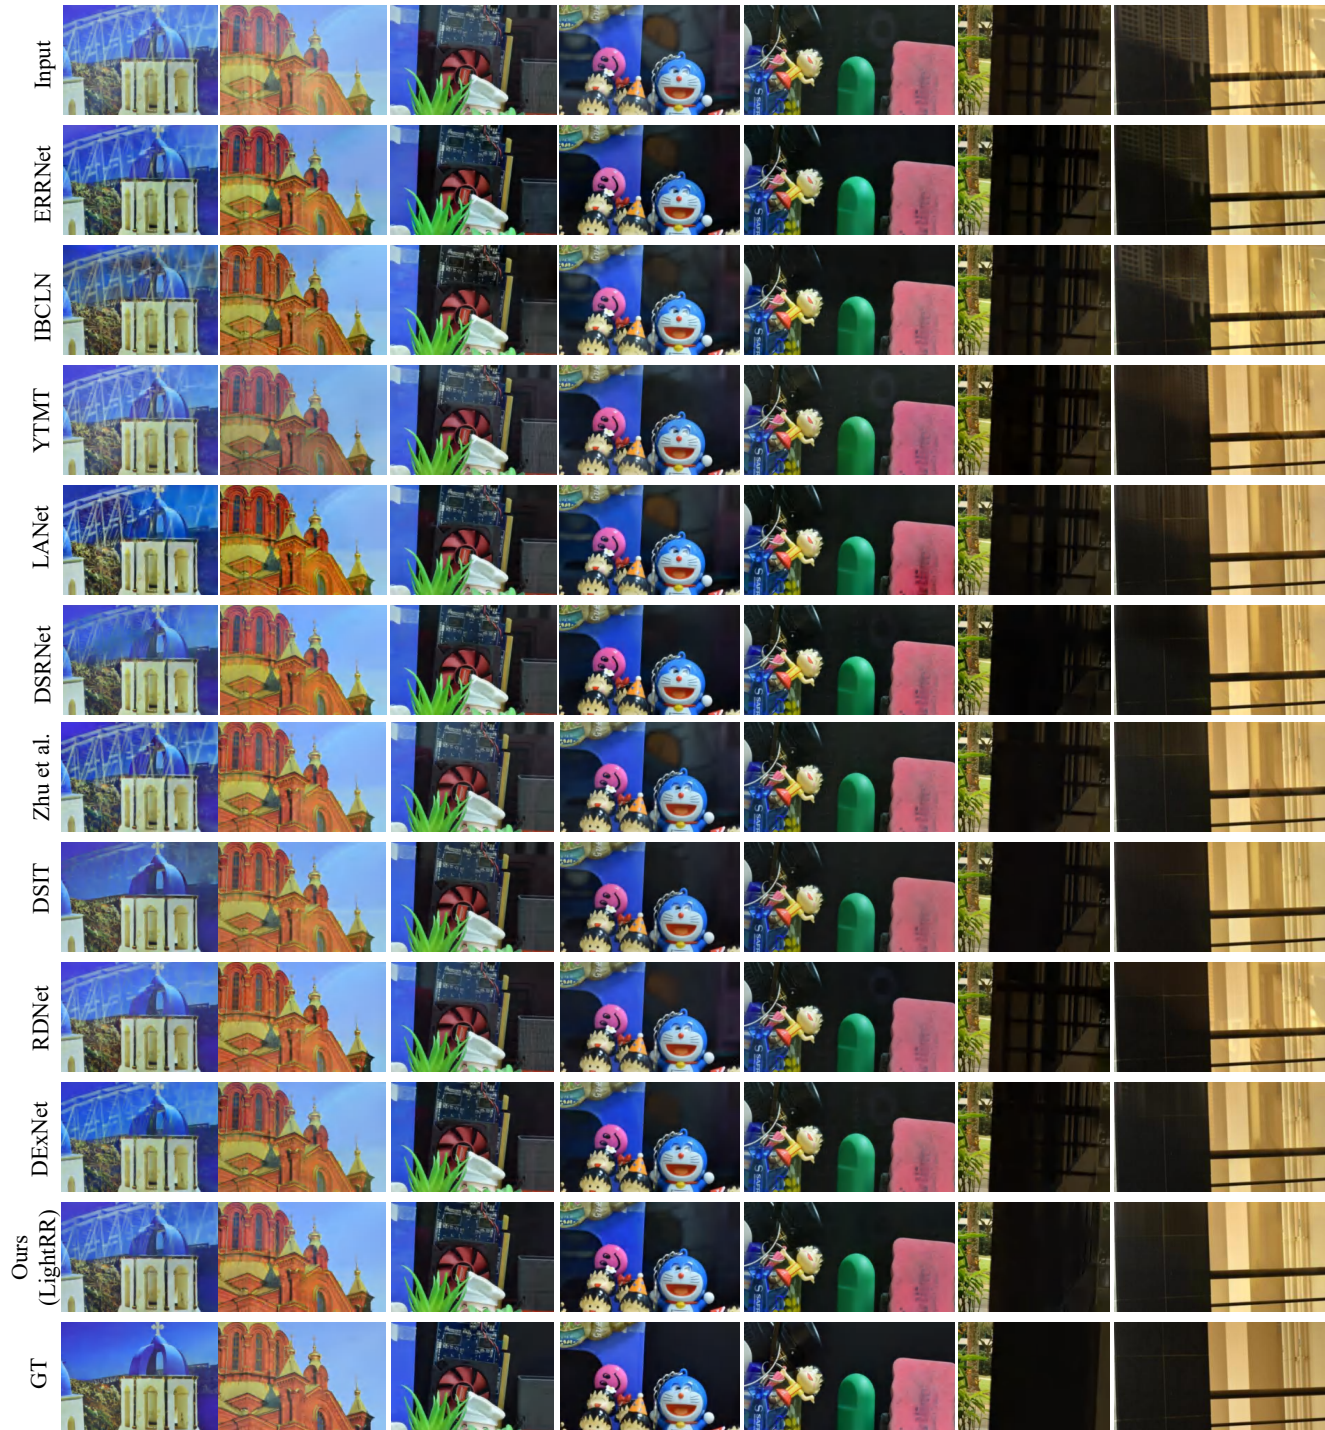

Figure 8. Visual comparisons on the **Real20** dataset. Our LightRR effectively separates reflection layers while maintaining the color fidelity of the transmission layer.

563 blocks) before entering the LSF attention module. The  
 564 number of blocks for these intermediate layers corre-  
 565 sponds to the encoder stages:  $N = [2, 3, 3]$  for Stages  
 566 1, 2, and 3, respectively.

### 7.3. Knowledge Distillation Setup

To compensate for the limited capacity of the lightweight  
 encoder, we incorporate a Knowledge Distillation (KD)

567

568

569

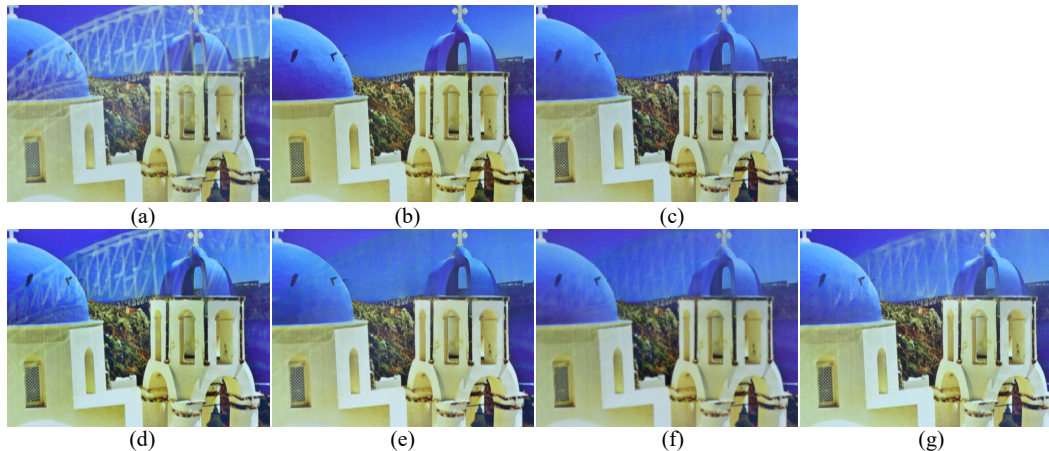

Figure 9. Visual comparison of ablation studies. (a) Input image. (b) Ground Truth. (c) **Ours (LightRR)**. (d) w/o AF-SSM (using standard 2D-SSM). (e) w/o Wavelet Sampling (using Sub-pixel Conv). (f) Direct VGG Injection (using VGG19 features directly as encoder input without distillation). (g) w/o Pre-trained Features (training from scratch without any VGG prior). Zoom in for best view.

Table 7. Detailed Architecture Configurations for SOTA Methods and their Lightweight Variants. The “Light” variants are modified to have parameter counts comparable to LightRR.

| Method | Variant  | Channels                      | Encoder Blocks   | Decoder Blocks  | Middle/Aux. Blocks |
|--------|----------|-------------------------------|------------------|-----------------|--------------------|
| DSRNet | Original | [64, 128, 256, 512]           | [2, 2, 4, 8]     | [2, 2, 2, 2]    | 12                 |
|        | Light    | [32, 64, 128, 256]            | [2, 2, 2]        | [2, 2, 2]       | 4                  |
| DSIT   | Original | [48, 96, 192, 384, 768, 1536] | [2, 2, 4, 8, 12] | [2, 2, 2, 2, 2] | [2, 2, 2, 2, 2]    |
|        | Light    | [32, 64, 128, 256, 512]       | [2, 2, 4, 8]     | [2, 2, 2, 2]    | [2, 2, 2, 2]       |
| RDNet  | Original | [64, 128, 256, 512]           | [2, 2, 4, 2]     | -               | -                  |
|        | Light    | [32, 64, 128, 256]            | [1, 1, 2, 1]     | -               | -                  |

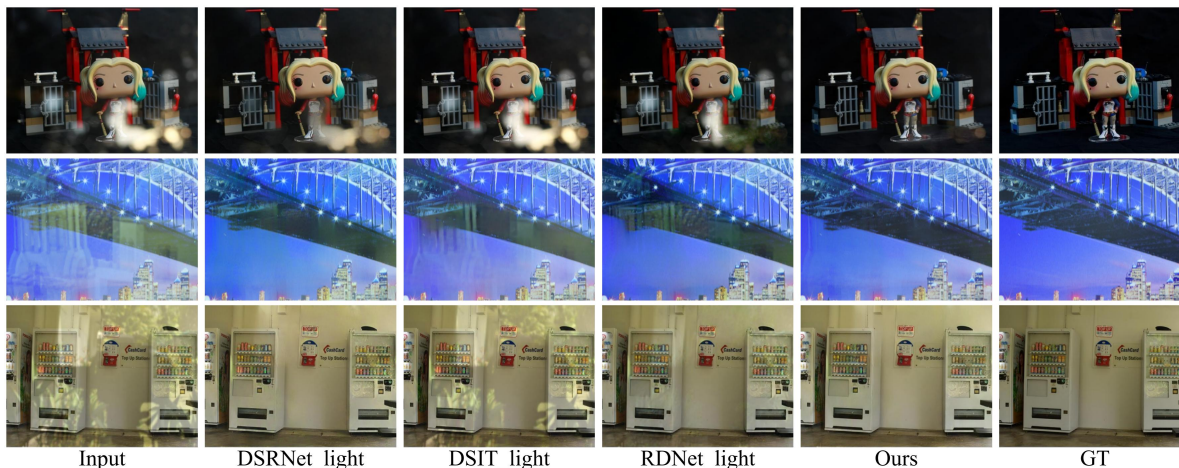

Figure 10. Visual Comparison of Lightweight Models against SOTA Methods. Under similar parameter constraints, LightRR demonstrates superior removal capabilities compared to the lightweight versions of DSRNet, DSIT, and RDNet. Zoom in for best view.

570 strategy during training. Specifically, we employ a pre-  
571 trained VGG19 network as the Teacher to provide multi-  
572 scale semantic guidance. The distillation loss, denoted as

$\mathcal{L}_{\text{distill}}$ , is minimized to align the intermediate feature rep-  
573 resentations of the Student (LightRR) with those of the  
574 Teacher. This forces the lightweight student to capture rich  
575

Table 8. Detailed architecture configuration of LightRR. The input resolution is denoted as  $H \times W$ , and the base channel number is  $C = 32$ . Note that ‘‘Middlers’’ refers to the intermediate processing layers for the skipped low-frequency (LL) features before they enter the LSF module.

| Stage                                     | Input Resolution                            | Channels              | Block Type        | Num. Blocks ( $N$ ) | LSF Heads |
|-------------------------------------------|---------------------------------------------|-----------------------|-------------------|---------------------|-----------|
| <i>Encoder Path</i>                       |                                             |                       |                   |                     |           |
| Tokenizer                                 | $H \times W$                                | $3 \rightarrow 32$    | Conv $3 \times 3$ | -                   | -         |
| Stage 1                                   | $H \times W$                                | 32                    | AFM Block         | 2                   | -         |
| Downsample 1                              | $H \times W \rightarrow H/2 \times W/2$     | $32 \rightarrow 64$   | WDD               | -                   | -         |
| Stage 2                                   | $H/2 \times W/2$                            | 64                    | AFM Block         | 3                   | -         |
| Downsample 2                              | $H/2 \times W/2 \rightarrow H/4 \times W/4$ | $64 \rightarrow 128$  | WDD               | -                   | -         |
| Stage 3                                   | $H/4 \times W/4$                            | 128                   | AFM Block         | 3                   | -         |
| Downsample 3                              | $H/4 \times W/4 \rightarrow H/8 \times W/8$ | $128 \rightarrow 256$ | WDD               | -                   | -         |
| <i>Bottleneck</i>                         |                                             |                       |                   |                     |           |
| Stage 4                                   | $H/8 \times W/8$                            | 256                   | AFM Block         | 4                   | -         |
| <i>Decoder Path &amp; Semantic Fusion</i> |                                             |                       |                   |                     |           |
| Decoder 1                                 | $H/8 \times W/8$                            | 256                   | AFM Block         | 4                   | -         |
| Fusion 1 (LSF)                            | $H/8 \times W/8$                            | 128                   | Middle Layer      | -                   | 4 Heads   |
| Upsample 1                                | $H/8 \times W/8 \rightarrow H/4 \times W/4$ | 128                   | WSU               | -                   | -         |
| Decoder 2                                 | $H/4 \times W/4$                            | 128                   | AFM Block         | 3                   | -         |
| Fusion 2 (LSF)                            | $H/4 \times W/4$                            | 64                    | Middle Layer      | -                   | 2 Heads   |
| Upsample 2                                | $H/4 \times W/4 \rightarrow H/2 \times W/2$ | 64                    | WSU               | -                   | -         |
| Decoder 3                                 | $H/2 \times W/2$                            | 64                    | AFM Block         | 3                   | -         |
| Fusion 3 (LSF)                            | $H/2 \times W/2$                            | 32                    | Middle Layer      | -                   | 1 Head    |
| Upsample 3                                | $H/2 \times W/2 \rightarrow H \times W$     | 32                    | WSU               | -                   | -         |
| Final Output                              | $H \times W$                                | $64 \rightarrow 3$    | Conv $3 \times 3$ | -                   | -         |

576 structural and semantic information inherent in the teacher’s  
577 deep features.

578 Table 9 details the correspondence between the LightRR  
579 encoder stages and the specific feature maps extracted from  
580 the VGG19 teacher. Note that since the channel widths of  
581 LightRR are smaller than those of VGG19, we align the  
582 channel dimensions before computing the loss.

Table 9. Correspondence between LightRR Encoder Stages and VGG19 Layers for Knowledge Distillation.

| Student Stage (LightRR) | Teacher Feature Map Size(VGG19) |
|-------------------------|---------------------------------|
| Encoder Stage 1 Output  | $64 \times H \times W$          |
| Encoder Stage 2 Output  | $128 \times H/2 \times W/2$     |
| Encoder Stage 3 Output  | $256 \times H/4 \times W/4$     |
| Bottleneck Output       | $512 \times H/8 \times W/8$     |

583

## References

584

585

586

587

588

589

590

591

592

593

594

595

596

597

598

599

600

601

602

603

604

605

606

607

608

609

610

611

612

613

614

615

616

617

618

619

620

621

622

623

624

625

626

627

628

629

630

631

632

633

634

635

636

637

638

639

- [1] Ya-Chu Chang, Chia-Ni Lu, Chia-Chi Cheng, and Wei-Chen Chiu. Single image reflection removal with edge guidance, reflection classifier, and recurrent decomposition. In *2021 IEEE Winter Conference on Applications of Computer Vision (WACV)*, pages 2032–2041, 2021. 2
- [2] Zheng Dong, Ke Xu, Yin Yang, Hujun Bao, Weiwei Xu, and Rynson W.H. Lau. Location-aware single image reflection removal. In *2021 IEEE/CVF International Conference on Computer Vision (ICCV)*, pages 4997–5006, 2021. 5
- [3] Mark Everingham, Luc Gool, Christopher K. Williams, John Winn, and Andrew Zisserman. The pascal visual object classes (voc) challenge. *Int. J. Comput. Vision*, 88(2): 303–338, 2010. 5
- [4] Qingnan Fan, Jiaolong Yang, Gang Hua, Baoquan Chen, and David Wipf. A generic deep architecture for single image reflection removal and image smoothing. In *Proceedings of the IEEE International Conference on Computer Vision*, pages 3238–3247, 2017. 2, 5
- [5] Albert Gu and Tri Dao. Mamba: Linear-time sequence modeling with selective state spaces. *arXiv preprint arXiv:2312.00752*, 2023. 3
- [6] Albert Gu and Tri Dao. Mamba: Linear-time sequence modeling with selective state spaces. In *First conference on language modeling*, 2024. 1
- [7] Albert Gu, Tri Dao, Stefano Ermon, Atri Rudra, and Christopher Ré. Hippo: Recurrent memory with optimal polynomial projections. *Advances in neural information processing systems*, 33:1474–1487, 2020. 2
- [8] Albert Gu, Karan Goel, and Christopher Ré. Efficiently modeling long sequences with structured state spaces. *arXiv preprint arXiv:2111.00396*, 2021. 2
- [9] Albert Gu, Isys Johnson, Karan Goel, Khaled Saab, Tri Dao, Atri Rudra, and Christopher Ré. Combining recurrent, convolutional, and continuous-time models with linear state space layers. *Advances in neural information processing systems*, 34:572–585, 2021. 1, 2
- [10] Hang Guo, Jinmin Li, Tao Dai, Zhihao Ouyang, Xudong Ren, and Shu-Tao Xia. Mambair: A simple baseline for image restoration with state-space model. In *ECCV*, 2024. 1, 3, 8
- [11] Qiming Hu and Xiaojie Guo. Trash or treasure? an interactive dual-stream strategy for single image reflection separation. *Advances in Neural Information Processing Systems*, 34:24683–24694, 2021. 2, 5
- [12] Qiming Hu and Xiaojie Guo. Single image reflection separation via component synergy. In *Proceedings of the IEEE/CVF International Conference on Computer Vision*, pages 13138–13147, 2023. 1, 2, 5
- [13] Qiming Hu, Hainuo Wang, and Xiaojie Guo. Single image reflection separation via dual-stream interactive transformers. In *Proceedings of the 38th International Conference on Neural Information Processing Systems*, Red Hook, NY, USA, 2024. Curran Associates Inc. 1, 2, 5
- [14] Jun-Jie Huang, Tianrui Liu, Jingyuan Xia, Meng Wang, and Pier Luigi Dragotti. Durrnet: Deep unfolded single image reflection removal network with joint prior. In *ICASSP 2024 - 2024 IEEE International Conference on Acoustics, Speech and Signal Processing (ICASSP)*, pages 5235–5239, 2024. 2
- [15] Jun-Jie Huang, Tianrui Liu, Zihan Chen, Xinwang Liu, Meng Wang, and Pier Luigi Dragotti. A lightweight deep exclusion unfolding network for single image reflection removal. *IEEE Transactions on Pattern Analysis and Machine Intelligence*, 47(6):4957–4973, 2025. 2, 5
- [16] Anat Levin, Assaf Zomet, and Yair Weiss. Learning to perceive transparency from the statistics of natural scenes. *Advances in Neural Information Processing Systems*, 15, 2002. 2
- [17] Chao Li, Yixiao Yang, Kun He, Stephen Lin, and John E Hopcroft. Single image reflection removal through cascaded refinement. In *Proceedings of the IEEE/CVF conference on computer vision and pattern recognition*, pages 3565–3574, 2020. 2, 5
- [18] Yu Li and Michael S. Brown. Single image layer separation using relative smoothness. In *2014 IEEE Conference on Computer Vision and Pattern Recognition*, pages 2752–2759, 2014. 2
- [19] Yue Liu, Yunjie Tian, Yuzhong Zhao, Hongtian Yu, Lingxi Xie, Yaowei Wang, Qixiang Ye, and Yunfan Liu. Vmamba: Visual state space model. *arXiv preprint arXiv:2401.10166*, 2024. 3
- [20] Ze Liu, Yutong Lin, Yue Cao, Han Hu, Yixuan Wei, Zheng Zhang, Stephen Lin, and Baining Guo. Swin transformer: Hierarchical vision transformer using shifted windows. In *Proceedings of the IEEE/CVF International Conference on Computer Vision (ICCV)*, 2021. 5
- [21] Olga Russakovsky, Jia Deng, Hao Su, Jonathan Krause, Sanjeev Satheesh, Sean Ma, Zhiheng Huang, Andrej Karpathy, Aditya Khosla, Michael Bernstein, Alexander C. Berg, and Li Fei-Fei. ImageNet Large Scale Visual Recognition Challenge. *International Journal of Computer Vision (IJCV)*, 115 (3):211–252, 2015. 5
- [22] Yuan Shi, Bin Xia, Xiaoyu Jin, Xing Wang, Tianyu Zhao, Xin Xia, Xuefeng Xiao, and Wenming Yang. Vmambair: Visual state space model for image restoration. *arXiv preprint arXiv:2403.11423*, 2024. 1, 3
- [23] YiChang Shih, Dilip Krishnan, Fredo Durand, and William T Freeman. Reflection removal using ghosting cues. In *Proceedings of the IEEE conference on computer vision and pattern recognition*, pages 3193–3201, 2015. 2
- [24] Karen Simonyan and Andrew Zisserman. Very deep convolutional networks for large-scale image recognition. *CoRR*, abs/1409.1556, 2014. 5
- [25] Jimmy TH Smith, Andrew Warrington, and Scott W Linderman. Simplified state space layers for sequence modeling. *arXiv preprint arXiv:2208.04933*, 2022. 1
- [26] Renjie Wan, Boxin Shi, Ling-Yu Duan, Ah-Hwee Tan, and Alex C Kot. Benchmarking single-image reflection removal algorithms. In *Proceedings of the IEEE International Conference on Computer Vision*, pages 3922–3930, 2017. 5, 1
- [27] Renjie Wan, Boxin Shi, Ling-Yu Duan, Ah-Hwee Tan, Wen Gao, and Alex C Kot. Region-aware reflection removal with unified content and gradient priors. *IEEE Transactions on Image Processing*, 27(6):2927–2941, 2018. 2

640

641

642

643

644

645

646

647

648

649

650

651

652

653

654

655

656

657

658

659

660

661

662

663

664

665

666

667

668

669

670

671

672

673

674

675

676

677

678

679

680

681

682

683

684

685

686

687

688

689

690

691

692

693

694

695

696

- 697 [28] Renjie Wan, Boxin Shi, Haoliang Li, Ling-Yu Duan, Ah-  
698 Hwee Tan, and Alex C. Kot. Corm: Cooperative reflection  
699 removal network. *IEEE Transactions on Pattern Analysis  
700 and Machine Intelligence*, 42(12):2969–2982, 2020. 2
- 701 [29] Kaixuan Wei, Jiaolong Yang, Ying Fu, David Wipf, and  
702 Hua Huang. Single image reflection removal exploiting mis-  
703 aligned training data and network enhancements. In *Pro-  
704 ceedings of the IEEE/CVF Conference on Computer Vision  
705 and Pattern Recognition*, pages 8178–8187, 2019. 2, 5
- 706 [30] Jianwei Yang, Chunyuan Li, Xiyang Dai, and Jianfeng Gao.  
707 Focal modulation networks. In *Proceedings of the 36th Inter-  
708 national Conference on Neural Information Processing Sys-  
709 tems*, Red Hook, NY, USA, 2022. Curran Associates Inc. 5
- 710 [31] Yang Yang, Wenye Ma, Yin Zheng, Jian-Feng Cai, and  
711 Weiyu Xu. Fast single image reflection suppression via con-  
712 vex optimization. In *Proceedings of the IEEE/CVF con-  
713 ference on computer vision and pattern recognition*, pages  
714 8141–8149, 2019. 2
- 715 [32] Syed Waqas Zamir, Aditya Arora, Salman Khan, Mu-  
716 nawar Hayat, Fahad Shahbaz Khan, and Ming-Hsuan Yang.  
717 Restormer: Efficient transformer for high-resolution image  
718 restoration. In *2022 IEEE/CVF Conference on Computer  
719 Vision and Pattern Recognition (CVPR)*, pages 5718–5729,  
720 2022. 4
- 721 [33] Xuaner Zhang, Ren Ng, and Qifeng Chen. Single image re-  
722 flection separation with perceptual losses. In *Proceedings of  
723 the IEEE conference on computer vision and pattern recog-  
724 nition*, pages 4786–4794, 2018. 2, 5, 1
- 725 [34] Hao Zhao, Mingjia Li, Qiming Hu, and Xiaojie Guo. Re-  
726 versible Decoupling Network for Single Image Reflection  
727 Removal. In *2025 IEEE/CVF Conference on Computer Vi-  
728 sion and Pattern Recognition (CVPR)*, pages 26430–26439,  
729 Los Alamitos, CA, USA, 2025. IEEE Computer Society. 1,  
730 2, 5
- 731 [35] Lianghui Zhu, Bencheng Liao, Qian Zhang, Xinlong Wang,  
732 Wenyu Liu, and Xinggang Wang. Vision mamba: Efficient  
733 visual representation learning with bidirectional state space  
734 model. In *Forty-first International Conference on Machine  
735 Learning*, 2024. 3
- 736 [36] Yurui Zhu, Xueyang Fu, Peng-Tao Jiang, Hao Zhang, Qibin  
737 Sun, Jinwei Chen, Zheng-Jun Zha, and Bo Li. Revisiting sin-  
738 gle image reflection removal in the wild. In *Proc. IEEE/CVF  
739 Conference on Computer Vision and Pattern Recognition  
740 (CVPR)*, 2023. 2, 5
- 741 [37] Wenbin Zou, Hongxia Gao, Weipeng Yang, and Tongtong  
742 Liu. Wave-mamba: Wavelet state space model for ultra-high-  
743 definition low-light image enhancement. In *ACM Multime-  
744 dia 2024*, 2024. 1, 3
